# Supplementary material for: One-step rod coating of high-performance silver nanowire–PEDOT:PSS flexible electrodes with enhanced adhesion after sulfuric acid post-treatment
Source: Royal Society of Chemistry journal article supplement (doi:10.1039/c5ra19148c), 2015-01-01
Supplement: c5ra19148c1.pdf [file c5ra19148c1.pdf]

### Supporting information

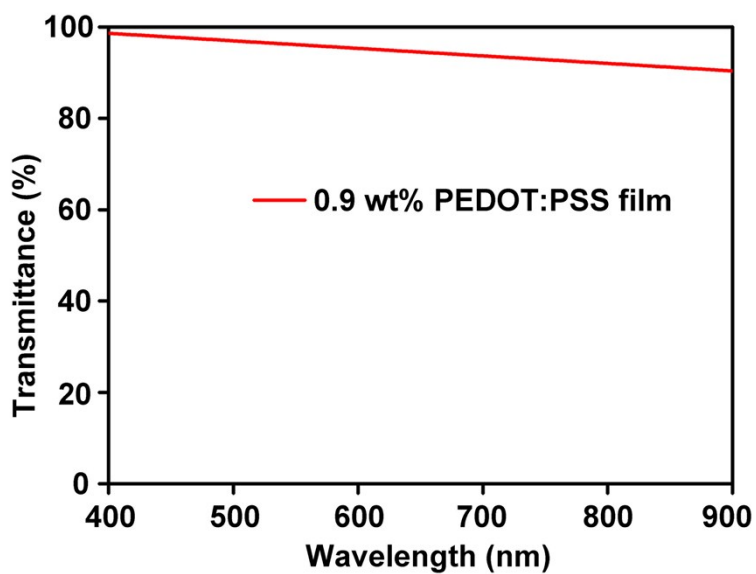

Fig. S1. Optical transmittance spectra of 0.9 wt% PEDOT:PSS film.

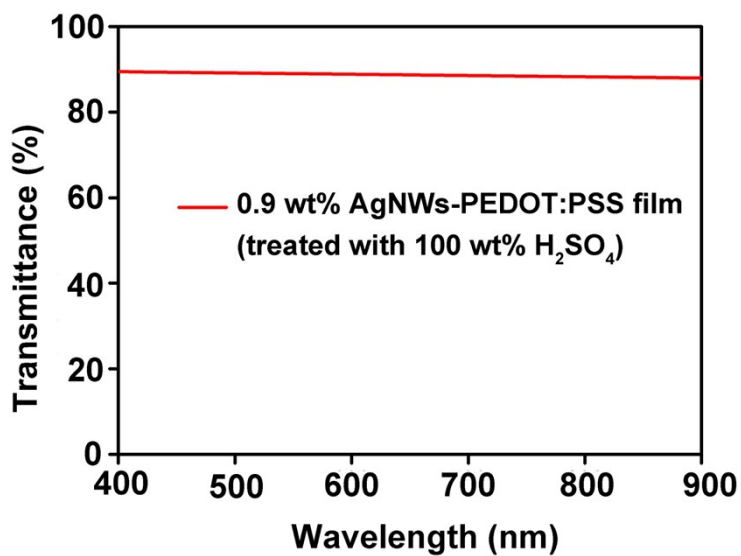

Fig. S2. Optical transmittance spectra of 0.9 wt% AgNWs-PEDOT:PSS composite film treated with 100 wt% H<sub>2</sub>SO<sub>4</sub>.
